# Supplementary material for: Molecular Fingerprinting and Hybridity Authentication in Cowpea Using Single Nucleotide Polymorphism Based Kompetitive Allele-Specific PCR Assay
Source: Front Plant Sci. 2021 Oct 5;12:734117. doi: 10.3389/fpls.2021.734117 (PMC8524091; doi:10.3389/fpls.2021.734117)
Supplement: Supplementary file 1 [file Data_Sheet_1.xlsx]

## Sheet: SuppFigure1-1_SNP viwer output
Supplementary Figure 1-1 SNPviewer cluster plot depicting the performance of the first four SNPs in sample plate number one. Blue clusters are homozygous samples for allele 1, green central clusters are heterozygous samples and red clusters are homozygous samples for alternative allele 2. The black data points represent the no template controls (NTC) which are wells that do not contain any templa…
				snpVU00001								snpVU00003
				snpVU00002							snpVU00004

## Sheet: SuppFigure1-2_PC variances
Supplementary Figure 1-2 Variance explained by the principal components (PCs). (A) Cumulative variance plot platueing at 10 PCs; the first 2 PCs explained about 35% of variation and it requires 10 PCs to acount for over 90% of the total variance (B) scree plot showing proportion of variances explained by each PC.
